# Supplementary material for: Anti-EFG1 2′-OMethylRNA oligomer inhibits Candida albicans filamentation and attenuates the candidiasis in Galleria mellonella
Source: PubMed Central journal article supplement — Mol Ther Nucleic Acids. 2021 Dec 16;27:517–23. doi: 10.1016/j.omtn.2021.12.018 (PMC8728520; doi:10.1016/j.omtn.2021.12.018), 2021-12-16
Supplement: mmc1.pdf [file mmc1.pdf]

OMTN, Volume 27

**Supplemental information**

**Anti-*EFG1* 2'-OMethylRNA oligomer inhibits  
*Candida albicans* filamentation and attenuates  
the candidiasis in *Galleria mellonella***

**Daniela Araújo, Dalila Mil-Homens, Mariana Henriques, and Sónia Silva**

### Supplemental Information

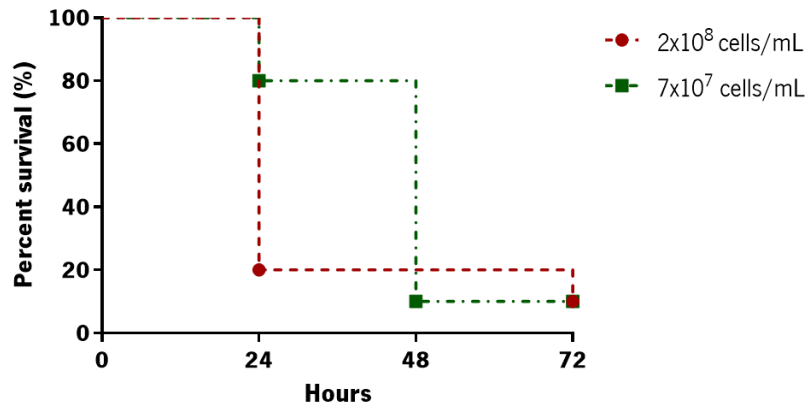

**Figure S1. Study of *Galleria mellonella* lethality.** For each control, 10 larvae were injected with two different concentrations of *Candida albicans* cells ( $2 \times 10^8$  and  $7 \times 10^7$  cells mL<sup>-1</sup> cells mL<sup>-1</sup>).
