# Supplementary material for: Anti-EFG1 2′-OMethylRNA oligomer inhibits Candida albicans filamentation and attenuates the candidiasis in Galleria mellonella
Source: PubMed Central journal article supplement — Mol Ther Nucleic Acids. 2021 Dec 16;27:517–23. doi: 10.1016/j.omtn.2021.12.018 (PMC8728520; doi:10.1016/j.omtn.2021.12.018), 2021-12-16
Supplement: mmc2.pdf [file mmc2.pdf]

# Anti-*EFG1* 2'-OMethylRNA oligomer inhibits *Candida albicans* filamentation and attenuates the candidiasis in *Galleria mellonella*

Daniela Araújo,<sup>1</sup> Dalila Mil-Homens,<sup>2</sup> Mariana Henriques,<sup>1</sup> and Sónia Silva<sup>1,3</sup>

<sup>1</sup>LIBRO – Laboratório de Investigação em Biofilmes Rosário Oliveira, CEB – Centre of Biological Engineering, University of Minho, 4710-057 Braga, Portugal; <sup>2</sup>iBB-Institute for Bioengineering and Biosciences, Instituto Superior Técnico, Lisbon University, 1049-001 Lisbon, Portugal; <sup>3</sup>National Institute for Agrarian and Veterinary Research, Vairão, 4485-655 Vila do Conde, Portugal

***EFG1* is a central transcriptional regulator of filamentation that is an important virulence factor of *Candida albicans*. This study serves to assess *in vivo* the applicability of the anti-*EFG1* 2'-OMethylRNA oligomer for inhibiting *C. albicans* filamentation and to attenuate candidiasis, using the *Galleria mellonella* model. For that, larvae infected with a lethal concentration of *C. albicans* cells were treated with a single dose and with a double dose of the anti-*EFG1* 2'OMe oligomer (at 40 and 100 nM). The anti-*EFG1* 2'OMe oligomer toxicity and effect on larvae survival was evaluated. No evidence of anti-*EFG1* 2'OMe oligomer toxicity was observed and the treatment with double dose of 2'OMe oligomer empowered larvae survival over 24 h (by 90%–100%) and prolonged its efficacy until 72 h of infection (by 30%). Undoubtedly, this work validates the *in vivo* therapeutic potential of anti-*EFG1* 2'OMe oligomer for controlling *C. albicans* infections.**

## INTRODUCTION

*Candida albicans* remains the most common human fungal pathogen,<sup>1</sup> and the most prevalent of all *Candida* species over the world.<sup>1</sup> The pathogenicity of *C. albicans* is dependent of certain virulence factors in which the morphological transition from yeast to filamentous forms is recognized as one of the most alarming.<sup>2–5</sup> The *EFG1* gene is one of the most important and well-studied regulators of *C. albicans* filamentation.<sup>6–11</sup> Recently, we applied antisense technology to project the anti-*EFG1* 2'-OMethylRNA (2'OMe) oligomer, to control *EFG1* gene expression, and to prevent *C. albicans* filamentation.<sup>12</sup> The anti-*EFG1* 2'OMe oligomer was designed based on the second generation of chemical modifications (2'-OMethyl) to guarantee nuclease resistance, improve RNA affinity and potency, and to reduce its toxicity.<sup>13</sup> Our *in vitro* work revealed the anti-*EFG1* 2'OMe oligomer's ability to reduce *C. albicans* cell filamentation (by 80%). Moreover, it was verified that the anti-*EFG1* 2'OMe oligomer maintains efficacy in different human body fluids.<sup>12</sup> Given these findings, anti-*EFG1* 2'OMe oligomer's *in vivo* validation is crucial. Among the *in vivo* models available, invertebrate models, such as *Galleria mellonella*, have emerged at the forefront in the study of fungal pathogenesis.<sup>14,15</sup> The possibilities of pathogen delivery into larvae, by topical, oral, and injection application is suited to study pathogens

at human body temperature makes it a desirable model for the study of fungal pathogenesis.<sup>15,16</sup>

Based on promising *in vitro* results,<sup>12</sup> the main goal of this work is to validate *in vivo* the applicability of the anti-*EFG1* 2'OMe oligomer for inhibiting *C. albicans* filamentation and to attenuate candidiasis.

## RESULTS

### Anti-*EFG1* 2'OMe oligomer toxicity

To assess the anti-*EFG1* 2'OMe oligomer toxicity, the *G. mellonella* survival rate was determined through the lactate dehydrogenase (LDH) released, and the number of hemocytes was also quantified. For that, *G. mellonella* larvae were injected with two different concentrations of oligomer (40 and 100 nM) and the survival evaluated during 96 h. As shown in Figure 1A, no death was observed for both tested concentrations over 96 h. Moreover, the injection of anti-*EFG1* 2'OMe oligomer did not increase the levels of LDH released on the hemolymphs of larvae after 4 and 24 h, since the levels of LDH are lower compared with levels released from untreated larvae (injected only with phosphate-buffered saline [PBS]) (Figure 1B). In terms of the total number of hemocytes, there is no evidence of differences between larvae injected with oligomer and the control larvae (Figure 1B). Thus, the anti-*EFG1* 2'OMe oligomer did not reveal toxic effects on *G. mellonella*.

### *G. mellonella* survival

To investigate the *in vivo* effects of the anti-*EFG1* 2'OMe oligomer on attenuation of *C. albicans* infections, a *G. mellonella* larvae model was used, infected with a lethal dose of yeast cells ( $7 \times 10^7$  cells mL<sup>-1</sup>). A first set of larvae was treated with a single dose (0 h post infection) of anti-*EFG1* 2'OMe oligomer at 40 and 100 nM (Figure 2). It is noteworthy that the treatment of infected *G. mellonella* with a single dose of anti-*EFG1* 2'OMe oligomer enhances the survival of larvae

Received 11 February 2021; accepted 14 December 2021;  
<https://doi.org/10.1016/j.omtn.2021.12.018>.

**Correspondence:** Sónia Silva, PhD, National Institute for Agrarian and Veterinary Research, Vairão, 4485-655 Vila do Conde, Portugal.

**E-mail:** [sonia.silva@iniav.pt](mailto:sonia.silva@iniav.pt); [sonia.silva@iniav.pt](mailto:sonia.silva@iniav.pt)

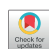

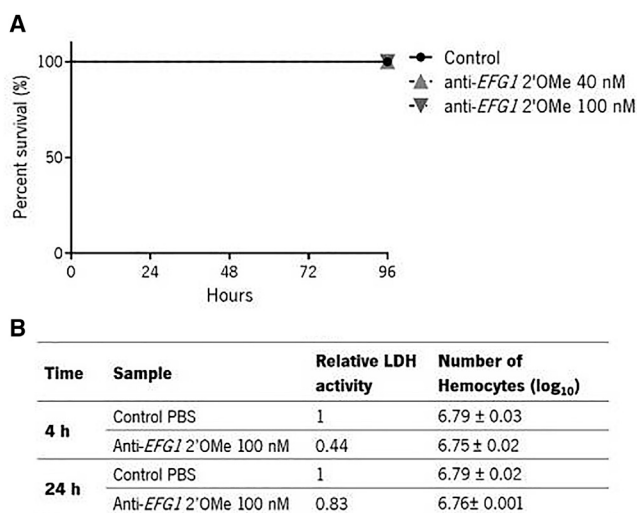

**Figure 1. Anti-*EFG1* 2'OMe oligomer toxicity evaluation in a *G. mellonella* model**

(A) Survival curves of larvae injected with 40 and 100 nM of anti-*EFG1* 2'OMe oligomer. For each condition, 10 larvae were injected with 40 and 100 nM of oligomer and their survival was monitored over 96 h. (B) Relative LDH activity released and total number of hemocytes counted after 4 and 24 h after injection with 100 nM of anti-*EFG1* 2'OMe oligomer. As controls, larvae were injected only with PBS.

over 24 h by 16% with 40 nM ( $p > 0.05$ ) and by 30% with 100 nM ( $p < 0.05$ ). Although, no effect was observed in larvae treated with 40 nM of anti-*EFG1* 2'OMe oligomer at 48 h ( $p > 0.05$ ), the treatment with 100 nM intensified the larvae survival into 17% ( $p > 0.05$ ). No significant effects were observed with a single dose after 72 h of infection for both concentrations tested ( $p > 0.05$ ).

A second set of infected larvae was treated with a double dose of anti-*EFG1* 2'OMe oligomer (0 and 12 h post infection), since the treatments are usually not carried out only with a unique dose (Figure 3A). The results showed that a double dose of anti-*EFG1* 2'OMe oligomer significantly enhances the *G. mellonella* survival. Of note, 90% and 100% of the larvae treated with 40 nM ( $p < 0.05$ ) and 100 nM ( $p < 0.001$ ) survived over the first 24 h of infection. An increase in *G. mellonella* survival was also evident at 48 h with a rate of 23% for 40 nM ( $p < 0.05$ ) and of 50% for 100 nM ( $p < 0.001$ ). Note that, the administration of a double dose of anti-*EFG1* 2'OMe oligomer not only was responsible by enhancing the larvae survival but also for prolonging the anti-*EFG1* 2'OMe oligomer effects over 72 h, achieving 30% more on the survival rate with 100 nM of oligomer ( $p < 0.001$ ). To infer about larvae health, the health index scores were also determined for larvae treated with 100 nM of oligomer. The larvae activity, cocoon formation, melanization, and survival were scored (Figure 3B). As can be seen, the injection of the larvae with anti-*EFG1* 2'OMe oligomer resulted in high health index scores even after 72 h, with a higher activity and cocoon formation.

To assess the effect of the anti-*EFG1* 2'OMe oligomer on candidiasis progression and *C. albicans* morphology, the fat body of larvae was

fixed, sectioned, stained, and evaluated. Figure 4A reveals the quantity and invasiveness progression of *C. albicans* without treatment after 24 and 48 h of infection. It is evident, that *C. albicans* cells are located mainly in digestive system, around the fat body and tend to organize into clusters with an extensive progression on quantity over the time. *Candida albicans* exhibits predominantly filamentous growth. The images highlight the contrast among the single- and double-dose treatments with the control, exhibiting both an expressive lower quantity of filaments with a significant decrease on fat body area occupied by *C. albicans* cells, with a more pronounced effect on sections of larvae treated with 100 nM of anti-*EFG1* 2'OMe oligomer. The effect of anti-*EFG1* 2'OMe oligomer on *EFG1* gene expression was also determined at 4 and 24 h post infection (Figure 4B). The results revealed no significant differences after 4 h despite a huge reduction in the levels of *EFG1* expression after 24 h post infection comparatively to the levels on untreated larvae ( $p < 0.001$ ).

### ***G. mellonella* immune response**

*G. mellonella* has an immune system with a high similarity to mammals in terms of its ability to produce antimicrobial peptides, and with the ability to eliminate microorganisms.<sup>17–19</sup> For that, the transcript levels of four encoding peptides with antimicrobial peptides, namely lysozyme, gallerimycin, galliomyacin, and inducible metalloproteinase inhibitor (IMPI), were quantified by quantitative real-time PCR. The expression levels of AMPs vary according to the peptide, in which lysozyme (Figure 5A) and galliomyacin (Figure 5B) presented higher levels of expression at 4 and 24 h post infection compared with the IMPI (Figure 5C) and gallerimycin (Figure 5D), indicating that these AMPs are expressed in a latter response to fight the infection. In the presence of anti-*EFG1* 2'OMe, in general, the levels of AMPs decreased both at 4 and 24 h post infection ( $p > 0.05$ ), with the exception of IMPI, which interestingly resulted in an increase in gene expression. No change in gene expression levels of galliomyacin was observed after 24 h (Figure 5B).

### **DISCUSSION**

Candidiasis is supported by a series of virulence factors, and one of the most important is the ability of *C. albicans* cells to switch from yeast to filamentous forms. The filamentation is essential for *C. albicans* pathogenicity,<sup>2–5</sup> and it is regulated by a complex network of genes in which *EFG1* is one of the most important virulence determinants.<sup>6,9–11</sup> Anti-*EFG1* 2'OMe was suggested to degrade *EFG1* mRNA by RNase activation. The *in vitro* results demonstrated the ability of anti-*EFG1* 2'OMe to reduce *C. albicans* cell filamentation (by 80%) and *EFG1* gene expression (by 60%).<sup>12</sup> Taking into account the promising *in vitro* results, the aim of this work was to validate *in vivo* its applicability for inhibiting *C. albicans* filamentation and to attenuate candidiasis using the *G. mellonella* model. As in other microbiological relevant studies,<sup>17–19</sup> we opted to use the *G. mellonella* model to validate the *in vivo* performance of the anti-*EFG1* 2'OMe oligomer, since it is a model that provides a rapid, inexpensive, and reliable way to evaluate the effects and toxicity *in vivo* of nano-drugs.

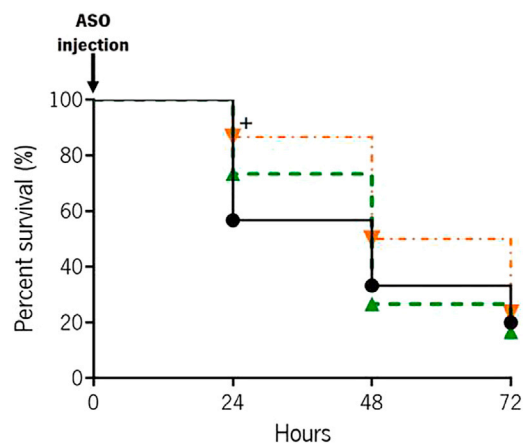

**Figure 2. Single-dose effect of anti-*EFG1* 2'OMe oligomer on the survival of *G. mellonella* infected with *C. albicans***

Survival curves of infected larvae were treated with a single dose of anti-*EFG1* 2'OMe oligomer (0 h post infection). Larvae infected with *C. albicans* cells were treated with 40 and 100 nM of anti-*EFG1* 2'OMe oligomer. As controls, larvae infected were injected only with PBS. \*Significant difference among control and a single dose of 100 nM of anti-*EFG1* 2'OMe oligomer at 24 h ( $p < 0.05$ ).

As in our *in vitro* results,<sup>12</sup> no evidence of *in vivo* toxicity was observed over 96 h (Figure 1). In fact, all larvae stayed alive over 96 h (Figure 1A) with no significant differences in terms of LDH released and in the total number of hemocytes (Figure 1B) on the hemolymphs of larvae compared with larvae injected only with PBS.

The infected *G. mellonella* larvae with  $7 \times 10^7$  cells  $\text{mL}^{-1}$  of *C. albicans* cells were treated with a single dose of anti-*EFG1* 2'OMe oligomer (0 h post infection). It was clear that the anti-*EFG1* 2'OMe oligomer maintains its performance *in vivo*, as an increase in larvae survival compared with untreated larvae was observed. Moreover, with these results it is also clear that the *in vivo* anti-*EFG1* 2'OMe oligomer efficacy is concentration dependent. In fact, the treatment of infected *G. mellonella* with a single dose of anti-*EFG1* 2'OMe oligomer enhances the survival of larvae over 24 h (16%), being more pronounced with 100 nM of oligomer (30%) (Figure 2). However, after 48 h of infection the anti-*EFG1* 2'OMe oligomer loses its effectiveness. This result was expected, as once in a clinical context, an infection is rarely controlled with a single dose of antimicrobial and the treatments are not usually carried out over a precise time.<sup>20–23</sup> To mimic that, a double dose of anti-*EFG1* 2'OMe oligomer was administered (0 and 12 h post infection) on *G. mellonella* larvae infected with *C. albicans* cells (Figure 3). The results indicate that, with a double-dose administration of anti-*EFG1* 2'OMe oligomer, it is possible to intensify the molecule efficacy and prolong its effect over time. In fact, larvae treated with the double dose of oligomer survived around 90% (with 40 nM) and 100% (with 100 nM) over the first 24 h (Figure 3A). Moreover, an increase on larvae survival was also evident at 48 h (by 50%) and 72 h (by 30%), with more pronounced effect in case of 100 nM of oligomer, with a high health index score. These findings corroborate with the observed

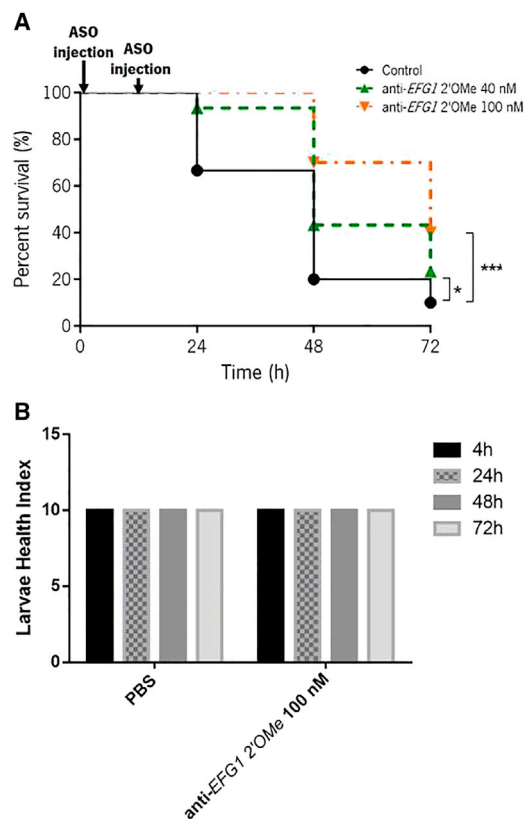

**Figure 3. Double-dose effect of anti-*EFG1* 2'OMe oligomer on *G. mellonella* infected with *C. albicans***

(A) Survival curves of infected larvae treated with a double dose of anti-*EFG1* 2'OMe oligomer (0 and 12 h post infection). Larvae infected with *C. albicans* cells were treated with 40 and 100 nM of anti-*EFG1* 2'OMe oligomer. As controls, larvae infected were injected only with PBS. (B) The health index scores of larvae treated with a double dose of 100 nM of anti-*EFG1* 2'OMe oligomer. Control represents the infected larvae treated only with PBS after 12 h post infection. \*Significant difference among control and a double dose of 40 nM of anti-*EFG1* 2'OMe oligomer for all times ( $p < 0.05$ ). \*\*\*Significant difference among control and a double dose of 100 nM of anti-*EFG1* 2'OMe ASO for all times ( $p < 0.001$ ).

histological images of *G. mellonella* fat body, which demonstrates a strong decrease in the number of *C. albicans* as filaments, and an evident reduction on the extension of area occupied by *Candida* cells in tissues from larvae treated with anti-*EFG1* 2'OMe oligomer (Figure 4A). The quantitative real-time PCR assays confirm a huge reduction in the levels of *EFG1* transcripts after 24 h of post infection and treated with the oligomer (Figure 4B), which is in accordance with the decrease in the number of *C. albicans* filaments.

The *G. mellonella* system presents an immune system with a highly similarity to the mammalian immune system, and the ability to release AMPs is important to fight infection.<sup>19,24</sup> In general, the expression of AMPs was lower in the presence of 100 nM of anti-*EFG1* 2'OMe oligomer, indicating a possible reduction in *C. albicans* infection (Figure 5) when larvae are treated with the oligomer.

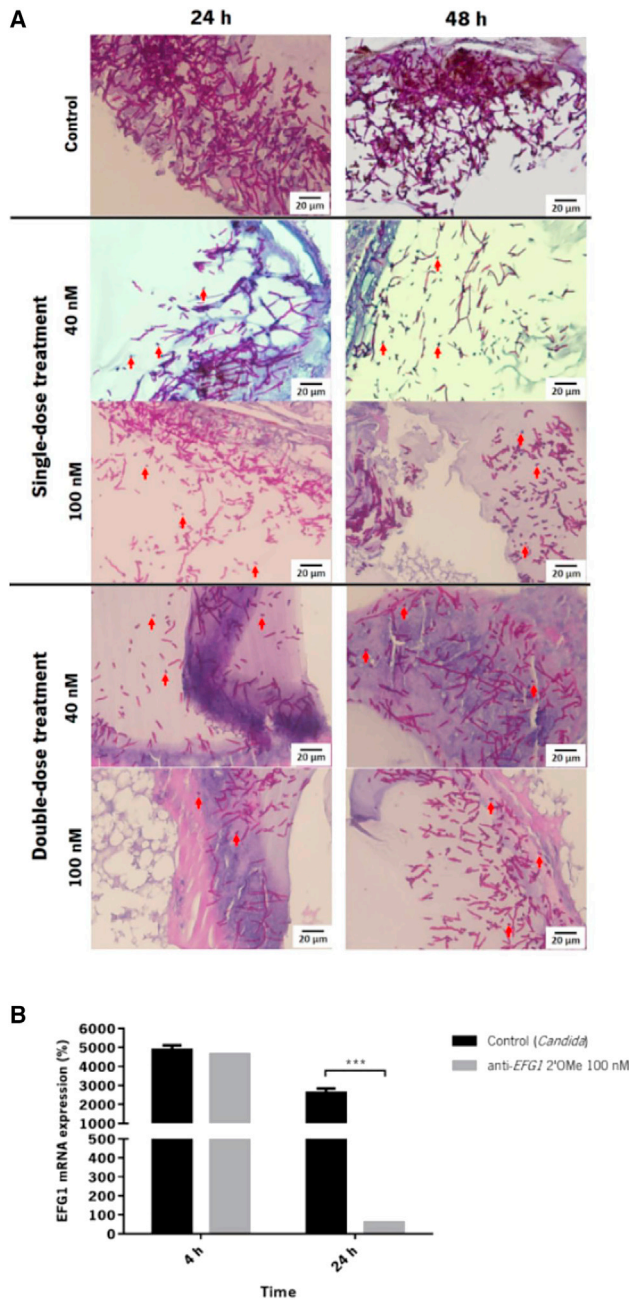

**Figure 4. Anti-*EFG1* 2'OMe oligomer effect on *C. albicans* cell morphology and progression into the fat body of *G. mellonella***

(A) Histological images of larvae infected with *C. albicans* (at 24 and 48 h) and treated with a single dose (0 h post infection) and with a double dose (0 and 12 h post infection) of 40 and 100 nM of anti-*EFG1* 2'OMe oligomer. The larvae sections were labeled with periodic acid Schiff coloration. The magnification images were at 400 $\times$ . (B) Levels of *EFG1* gene expression of larvae treated with a double dose of 100 nM of anti-*EFG1* 2'OMe oligomer evaluated by quantitative real-time PCR and analyzed by the  $\Delta$ Ct method and normalized to the *CaACT1* mRNA levels after 4 and 24 h post infection. Control represents the infected larvae treated only with PBS after 12 h post infection. Error bars represent standard deviation. \*\*\*Significant difference among control and a double dose of 100 nM of anti-*EFG1* 2'OMe oligomer at 24 h post infection ( $p < 0.001$ ).

Numerous studies have documented the use of antisense therapy (AST) as a biochemical tool for studying human target diseases; as of now, there are ten antisense drugs in the market. However, the application of AST as anti-*Candida* agents is still rare, and there is one study using AST to interrupt and efficiently inhibit *C. albicans* by *in vivo* splicing using a PS-modified antisense oligonucleotide (ASO).<sup>25</sup> Our results reveal that it is possible to synthesize an ASO modified by 2'-OMethyl chemical modification to control the virulence factor of *C. albicans*. Moreover, this study suggests that systemic delivery of anti-*EFG1* 2'OMe oligomer is feasible, devoid of toxicity, and could be a promising treatment strategy for *C. albicans* infections. Therefore, it warrants further studies in other animal models.

### Conclusions

Hereby, the present work confirms that the anti-*EFG1* 2'OMe oligomer is able to inhibit *C. albicans* filamentation and attenuates the candidiasis on *G. mellonella* model. Undoubtedly, this work reveals the *in vivo* therapeutic potential of anti-*EFG1* 2'OMe oligomer for controlling *C. albicans* infections.

### MATERIALS AND METHODS

#### Anti-*EFG1* 2'OMe oligomer preparation

The anti-*EFG1* 2'OMe oligomer was designed and synthesized based on the second generation of chemical modifications of nucleic acid mimics as described in our recent published works.<sup>12,26</sup> Aliquots of anti-*EFG1* 2'OMe oligomer were prepared in sterile ultrapure water to 4  $\mu$ M and stored at  $-20^{\circ}\text{C}$  for later use. Whenever necessary, oligomer molecules were diluted in PBS to final concentrations of 40 and 100 nM. The lower concentration was selected according to our previous results *in vitro*<sup>12</sup> and 100 nM was used to be tested as a higher concentration.

#### *C. albicans* cells and growth conditions

The *C. albicans* SC5314, belonging to the *Candida* strain collection of the Biofilm group of the Centre of Biological Engineering, was used during these studies. For all experiments, the yeast strain was subcultured on sabouraud dextrose agar (Merck, Germany) and incubated for 24 h at  $37^{\circ}\text{C}$ . Cells were then inoculated in sabouraud dextrose broth (Merck) and incubated overnight at  $37^{\circ}\text{C}$ , 120 rpm. After incubation, the cell suspensions were centrifuged for 10 min at  $3,000 \times g$  and  $4^{\circ}\text{C}$ , and washed twice with PBS (pH 7, 0.1 M). Pellets were suspended in 5 mL of PBS, and the cellular density was adjusted using a Neubauer chamber (Marienfeld, Land-Konicshofem, Germany) to  $7 \times 10^7$  cells  $\text{mL}^{-1}$ .

#### *G. mellonella* larvae

*G. mellonella* larvae were reared on a pollen grain and bee wax diet at  $25^{\circ}\text{C}$  in darkness and used in a final stage of development with a weight of approximately 250 mg. The larvae were injected into hemolymph via the hindmost left proleg, previously sanitized with 70% (v/v) ethanol, using a micro syringe adapted in micrometres to control the volume of injection.<sup>20</sup> All experiments were performed in triplicate and in a minimum of three independent assays.

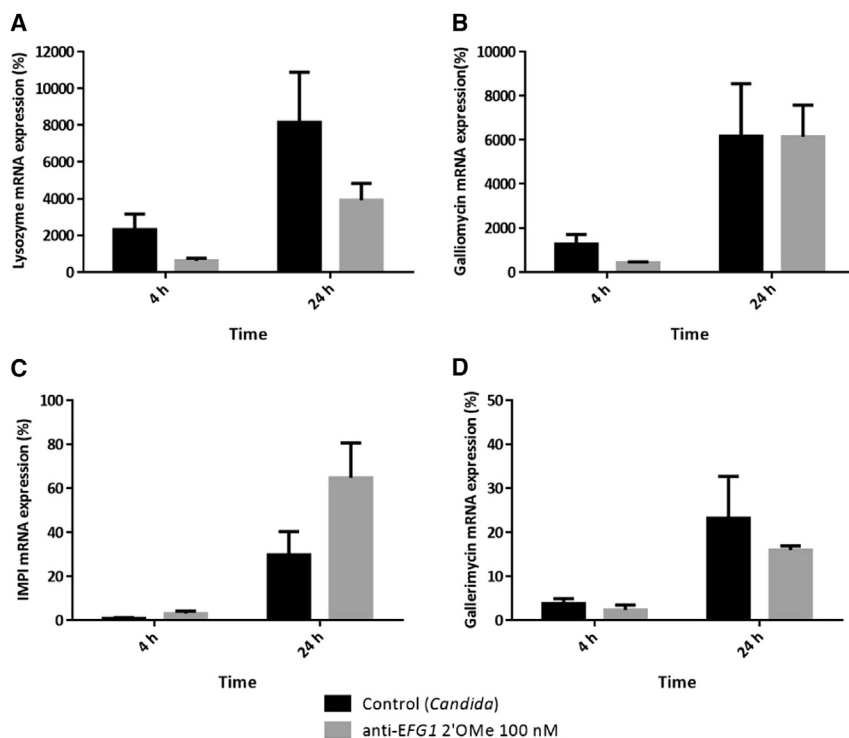

**Figure 5. Anti-*EFG1* 2'OMe oligomer effect on *G. mellonella* immune response**

Levels of gene expression on *G. mellonella* treated with a double dose of 100 nM of anti-*EFG1* 2'OMe oligomer (0 and 12 h post infection) of (A) lysozyme, (B) galliomycin, (C) inducible metalloproteinase inhibitor, and (D) gallerimycin, after 4 and 24 h of infection by *C. albicans* SC5314. These results were obtained by quantitative real-time PCR and analyzed by  $\Delta$ Ct method and normalized to the *GmACT1* mRNA levels. As a control, *G. mellonella* injected only with PBS after 12 h post infection was used. Error bars represent standard deviation.

were counted using a hemocytometer. The results are presented as a logarithm of the concentration ( $\text{Log}_{10}$ ).

#### *G. mellonella* survival assays

To study the effect of the anti-*EFG1* 2'OMe oligomer on the survival rate of *G. mellonella*, larvae were infected with 5  $\mu\text{L}$  of a lethal dose of *C. albicans* cells ( $7 \times 10^7$  cells  $\text{mL}^{-1}$ ) and randomly allocated to five different experimental groups (with a set of ten larvae). The concentration of *C. albicans* to be injected ( $7 \times 10^7$  cells  $\text{mL}^{-1}$ ) was selected on the basis of the

*G. mellonella* lethality results after injection with different concentrations of yeast cells (between  $7 \times 10^7$  and  $2 \times 10^8$  cells  $\text{mL}^{-1}$ ) (Figure S1). Two sets of larvae were treated with a single dose of 40 and 100 nM of oligomer (0 h of post infection); two sets of larvae with a double dose of 40 and 100 nM of oligomer (0 and 12 h of post infection); and a set only with PBS. As control, a set of larvae were injected only with the same volume of PBS. After injections, the larvae were placed in Petri dishes and stored in the dark at 37°C, over 72 h, and survival curves were subsequently constructed. The larvae were considered dead when they displayed no movement in response to touch. The *G. mellonella* health index was also determined for the larvae treated with a double dose of 100 nM of oligomer, which scores four main parameters: larvae activity, cocoon formation, melanization, and survival.<sup>27</sup>

#### Gene expression analysis

Quantitative real-time PCR was used to determine the *EFG1* gene expression on *C. albicans* after the treatment with 100 nM of anti-*EFG1* oligomer. The transcript levels of genes encoding the *G. mellonella* antimicrobial peptides, gallerimycin, galliomycin, IMPI, and lysozyme, were also determined to infer the *G. mellonella* immune response. For that, three larvae treated with oligomers at 4 and 24 h post infection and three larvae untreated were cryopreserved, sliced, and homogenized in lysis buffer reagent.

RNA extraction was performed using the PureLink RNA Mini Kit (Invitrogen, Carlsbad, CA, USA).<sup>12</sup> To avoid potential DNA contamination, samples were treated with DNase I (Deoxyribonuclease I,

#### Toxicity assays

To test the *in vivo* toxicity of the anti-*EFG1* 2'OMe oligomer, 10 larvae of *G. mellonella* were injected with 5  $\mu\text{L}$  of 40 and 100 nM of oligomer prepared in PBS. As control, a set of larvae were injected with the same volume but only with PBS. Larvae were placed in Petri dishes and stored in the dark at 37°C. Larvae morphology and survival were followed over 4 days and the survival curves were constructed.

The LDH activity released from larvae tissues to hemolymph was also evaluated. For that, larvae were sacrificed at 4 and 24 h after injection and the hemolymphs of five larvae were collected in an Eppendorf tube. This assay was performed using the CytoTox-ONE Homogeneous Membrane Integrity Assay Kit (Promega) according to the manufacturer's instructions. LDH activity was quantified by fluorescence spectrometer evaluation (Cytation 3 Cell Imaging Multi-Mode Reader, BioTek) by measuring the NADH disappearance rate at 560 nm excitation and 590 nm emission during the LDH-catalyzed conversion of pyruvate to lactate. The value of LDH activity of the larvae injected only with PBS used as a control was subtracted from the LDH activity of the larvae injected with 100 nM of anti-*EFG1* 2'OMe. The levels of LDH released were expressed as relative LDH activity.

The total numbers of hemocytes present in the hemolymphs of larvae were also evaluated. For that, three larvae previously sanitized with 70% (v/v) ethanol were punctured in the abdomen with a sterile needle and the hemolymphs were recovered in a sterile microtube. The hemolymph mixture was diluted 10-fold in sterile PBS and hemocytes

**Table 1. Primers used for quantitative real-time PCR**

|                            | Gene name                          | Sequence (5'–3')                    | Primer  |
|----------------------------|------------------------------------|-------------------------------------|---------|
| <i>Candida albicans</i>    | EFG1                               | TTCTGGTGCAGGTTCCAC                  | forward |
|                            |                                    | CCTGGTTGTGATGCAGGT                  | reverse |
|                            | ACT1                               | AATGGGTAGGGTGGGAAAAC                | forward |
|                            |                                    | AGCCATTTCATTGATCGTC                 | reverse |
| actin                      | ATCCTCACCTGAAGTACCC <sup>28</sup>  | P1RT                                |         |
|                            | CCACACGCAGCTCATTGTA <sup>28</sup>  | P2RT                                |         |
|                            | TCCCAACTTTGACCGACGA <sup>28</sup>  | P1RT                                |         |
|                            | AGTGGTTGCGCCATCCATAC <sup>28</sup> | P2RT                                |         |
| <i>Galleria mellonella</i> | galliomycin                        | TCGTATCGTCACCGCAAAATG <sup>29</sup> | P1RT    |
|                            |                                    | GCCGCAATGACCACCTTTATA <sup>29</sup> | P2RT    |
|                            | IMPI                               | AGATGGCTATGCAAGGGATG <sup>28</sup>  | P1RT    |
|                            |                                    | AGGACCTGTGCAGCATTCT <sup>28</sup>   | P2RT    |
| gallerimycin               | CGCAATATCATTGGCCTTCT <sup>28</sup> | P1RT                                |         |
|                            | CCTGCAGTTAGCAATGCAC <sup>28</sup>  | P2RT                                |         |

Amplification Grade, Invitrogen), and the RNA concentration was determined by optical density measurement (NanoDrop 1000 Spectrophotometer, Thermo Scientific). The cDNA was synthesized using the iScript Reverse Transcriptase (Bio-Rad, Berkeley, USA) in accordance with the manufacturer's instructions, and real-time qPCR (CFX96, Bio-Rad) was performed on a 96-well microtiter plate using Eva Green Supermix (Bio-Rad). Each reaction was performed in triplicate and mean values of expression were determined by the  $\Delta$ Ct method. Non-transcriptase reverse controls were included in each run. The primers used are presented in Table 1.

### G. mellonella histological fat body analysis

Histological analysis of *G. mellonella* was performed to study the effect of the anti-EFG1 2'OME oligomer on candidiasis progression and *C. albicans* morphology into fat body of larvae. For that, one larva from each group of study were recovered at 24 and 48 h, to be processed histologically. The fat body was removed, from each larva, through an incision in the midline of the ventral with a scalpel blade. The fat body was placed in 4% (v/v) of paraformaldehyde and stored for 24 h at 4°C to preserve the structures. The paraffin blocks were cut on sections of 4–5  $\mu$ m, and the sections were stained with periodic acid Schiff and hematoxylin and eosin. Tissue sections were viewed and photographed with an Olympus BX51 microscope coupled with a DP71 digital camera (Olympus Portugal SA, Porto, Portugal).

### Statistical analysis

Data are expressed as the mean  $\pm$  standard deviation of a least three independent experiments. Results were compared using two-way analysis of variance using GraphPad Prism 6 (GraphPad Software, CA, USA). All tests were performed with a confidence level of 95%. Kaplan-Meier survival curves were plotted and differences in survival were calculated by using log rank Mantel-Cox statistical test, all performed with GraphPad Prism 6.

## SUPPLEMENTAL INFORMATION

Supplemental information can be found online at <https://doi.org/10.1016/j.omtn.2021.12.018>.

## ACKNOWLEDGMENTS

This study was supported by the Portuguese Foundation for Science and Technology (FCT) under the scope of the strategic funding of UIDB/04469/2020 unit and BioTecNorte operation (NORTE-01-0145-FEDER-000004) funded by the European Regional Development Fund under the scope of Norte2-20 – Programa Operacional Regional do Norte and Daniela Eira Araújo [SFRH/BD/121417/2016] PhD grant. The authors also acknowledge the project funding by the “02/SAICT/2017 – Projetos de Investigação Científica e Desenvolvimento Tecnológico (IC&DT) – POCI-01-0145-FEDER-028893.” Funding received by IBB – Institute for Bioengineering and Biosciences from FCT (UID/BIO/04565/2020) and Programa Operacional Regional de Lisboa 2020 (project no. 007317) is also acknowledged. We acknowledge Dr Lucília Goretí Pinto, Life and Health Sciences Research Institute (ICVS), School of Medicine, University of Minho, for processing and sectioning tissue samples of *G. mellonella*.

## AUTHOR CONTRIBUTIONS

D.A. and S.S. conceived and designed the study. D.A. and D.M.-H. conducted the experiments. D.A. wrote the manuscript. M.H. and S.S. performed the analysis and read the paper. All authors read and approved the manuscript.

## DECLARATION OF INTERESTS

The authors declare no competing interests.

## REFERENCES

- Koehler, P., Stecher, M., Cornely, O.A., Koehler, D., Vehreschild, M.J.G.T., Bohlius, J., Wisplinghoff, H., and Vehreschild, J.J. (2019). Morbidity and mortality of candidemia in Europe: an epidemiologic meta-analysis. *Clin. Microbiol. Infect.* 25, 1200–1212.
- Silva, S., Negri, M., Henriques, M., Oliveira, R., Williams, D.W., and Azeredo, J. (2012). *Candida glabrata*, *Candida parapsilosis* and *Candida tropicalis*: biology, epidemiology, pathogenicity and antifungal resistance. *FEMS Microbiol. Rev.* 36, 288–305.
- Silva, S., Rodrigues, C., Araújo, D., Rodrigues, M., and Henriques, M. (2017). *Candida* species biofilms' antifungal resistance. *J. Fungi* 3, 8.
- Mayer, F.L., Wilson, D., and Hube, B. (2013). *Candida albicans* pathogenicity mechanisms. *Virulence* 4, 119–128.
- Araújo, D., Henriques, M., and Silva, S. (2017). Portrait of *Candida* species biofilm regulatory network genes. *Trends Microbiol.* 1, 62–75.
- Stoldt, V.R., Sonneborn, A., Leuker, C.E., and Ernst, J.F. (1997). Efg1p, an essential regulator of morphogenesis of the human pathogen *Candida albicans*, is a member of a conserved class of bHLH proteins regulating morphogenetic processes in fungi. *EMBO J.* 16, 1982–1991.
- Ernst, J.F. (2000). Transcription factors in *Candida albicans*—environmental control of morphogenesis. *Microbiology* 146, 763–774.
- Ramage, G., Vandewalle, K., López-Ribot, J.L., and Wickes, B.L. (2002). The filamentation pathway controlled by the Efg1 regulator protein is required for normal biofilm formation and development in *Candida albicans*. *FEMS Microbiol. Lett.* 214, 95–100.
- Nobile, C.J., and Mitchell, A.P. (2005). Regulation of cell-surface genes and biofilm formation by the *C. albicans* transcription factor Bcr1p. *Curr. Biol.* 15, 1150–1155.

10. Nobile, C.J., Fox, E.P., Nett, J.E., Sorrells, T.R., Mitrovich, Q.M., Hernday, A.D., Tuch, B.N., Andes, D.R., and Johnson, A.D. (2011). A recently evolved transcriptional network controls biofilm development in *Candida albicans*. *Cell* 148, 126–138.
11. Connolly, L., Riccombeni, A., Grózer, Z., Holland, L.M., Lynch, D.B., Andes, D.R., Gácsér, A., and Butler, G. (2013). The APSES transcription factor Efg1 is a global regulator that controls morphogenesis and biofilm formation in *Candida parapsilosis*. *Mol. Microbiol.* 90, 36–53.
12. Araújo, D., Azevedo, N.M., Barbosa, A., Almeida, C., Rodrigues, M.E., Henriques, M., and Silva, S. (2019). Application of 2'-OMethylRNA antisense oligomer to control *Candida albicans* EFG1 virulence determinant. *Mol. Ther. Nucleic Acids* 18, 508–517.
13. Khvorovaya, A., and Watts, J.K. (2017). The chemical evolution of oligonucleotide therapies of clinical utility. *Nat. Biotechnol.* 35, 238–248.
14. Fedhila, S., Buisson, C., Dussurget, O., Serror, P., Glomski, I.J., Liehl, P., Lereclus, D., and Nielsen-LeRoux, C. (2010). Comparative analysis of the virulence of invertebrate and mammalian pathogenic bacteria in the oral insect infection model *Galleria mellonella*. *J. Invertebr. Pathol.* 103, 24–29.
15. Junqueira, J.C. (2012). *Galleria mellonella* as a model host for human pathogens. *Virulence* 3, 474–476.
16. Fuchs, B.B., O'Brien, E., Khoury, J.B.E., and Mylonakis, E. (2010). Methods for using *Galleria mellonella* as a model host to study fungal pathogenesis. *Virulence* 1, 475–482.
17. Mak, P., and Zdybicka-barabas, A. (2010). A different repertoire of *Galleria mellonella* antimicrobial peptides in larvae challenged with bacteria and fungi. *Dev. Comp. Immunol.* 34, 1129–1136.
18. Moghaddam, M., Tonk, M., Schreiber, C., Salzig, D., Czermak, P., Vilcinskas, A., and Rahnamaeian, M. (2011). The potential of the *Galleria mellonella* innate immune system is maximized by the co-presentation of diverse antimicrobial peptides. *Biol. Chem.* 397, 939–945.
19. Tsai, C.J., Mei, J., Loh, S., and Proft, T. (2016). *Galleria mellonella* infection models for the study of bacterial diseases and for antimicrobial drug testing. *Virulence* 7, 214–229.
20. Mil-Homens, D., Ferreira-Dias, S., and Fialho, A.M. (2016). Fish oils against *Burkholderia* and *Pseudomonas aeruginosa*: *in vitro* efficacy and their therapeutic and prophylactic effects on infected *Galleria mellonella* larvae. *J. Appl. Microbiol.* 120, 1509–1519.
21. Vilela, S.F.G., Barbosa, J.O., Rossoni, R.D., Santos, J.D., Prata, M.C.A., Anbinder, A.L., Jorge, A.O.C., and Junqueira, J.C. (2015). *Lactobacillus acidophilus* ATCC 4356 inhibits biofilm formation by *C. albicans* and attenuates the experimental candidiasis in *Galleria mellonella*. *Virulence* 6, 29–39.
22. Rossoni, R.D., dos Santos Velloso, M., Figueiredo, L.M.A., Martins, C.P., Jorge, A.O.C., and Junqueira, J.C. (2018). Clinical strains of *Lactobacillus* reduce the filamentation of *Candida albicans* and protect *Galleria mellonella* against experimental candidiasis. *Folia Microbiol.* 63, 307–314.
23. Straarup, E.M., Fisker, N., Hedtjörn, M., Lindholm, M.W., Rosenbohm, C., Aarup, V., Hansen, H.F., Ørum, H., Hansen, J.B.R., and Koch, T. (2010). Short locked nucleic acid antisense oligonucleotides potently reduce apolipoprotein B mRNA and serum cholesterol in mice and non-human primates. *Nucleic Acids Res.* 38, 7100–7111.
24. Jemel, S., Guillot, J., Kallel, K., Botterel, F., and Dannaoui, E. (2020). *Galleria mellonella* for the evaluation of antifungal efficacy against medically important fungi, a narrative review. *Microorganisms* 8, 1–19.
25. Testa, S., Disney, M., Gryaznov, S., and Turner, D. Methods and compositions for inhibition of RNA splicing. U.S. patent WO/2000/055374, 2000.
26. Silva, S., Araújo, D., Azevedo, N.M., Almeida, C., Henriques, M. Antisense oligomers for controlling *Candida albicans* infections. International patent WO 2020/174366 A1, 2020.
27. Loh, J.M.S., Adenwalla, N., Wiles, S., and Proft, T. (2013). *Galleria mellonella* larvae as an infection model for group A streptococcus. *Virulence* 4, 419–428.
28. Altincicek, B., and Vilcinskas, A. (2006). Metamorphosis and collagen-IV-fragments stimulate innate immune response in the greater wax moth, *Galleria mellonella*. *Dev. Comp. Immunol.* 30, 1108–1118.
29. Wojda, I., Kowalski, P., and Jakubowicz, T. (2009). Humoral immune response of *Galleria mellonella* larvae after infection by *Beauveria bassiana* under optimal and heat-shock conditions. *J. Insect Physiol.* 55, 525–531.

OMTN, Volume 27

## Supplemental information

**Anti-*EFG1* 2'-OMethylRNA oligomer inhibits  
*Candida albicans* filamentation and attenuates  
the candidiasis in *Galleria mellonella***

**Daniela Araújo, Dalila Mil-Homens, Mariana Henriques, and Sónia Silva**



### Supplemental Information

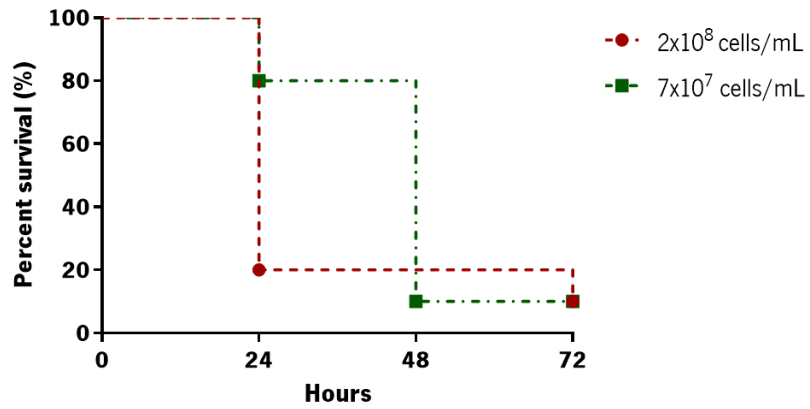

**Figure S1. Study of *Galleria mellonella* lethality.** For each control, 10 larvae were injected with two different concentrations of *Candida albicans* cells ( $2 \times 10^8$  and  $7 \times 10^7$  cells mL<sup>-1</sup> cells mL<sup>-1</sup>).
